# Supplementary material
Source: Springer Nature journal article supplement (https://www.springermedizin.de/resource/supplementary/13000_2009_221_MOESM5_ESM.pdf/9624100)

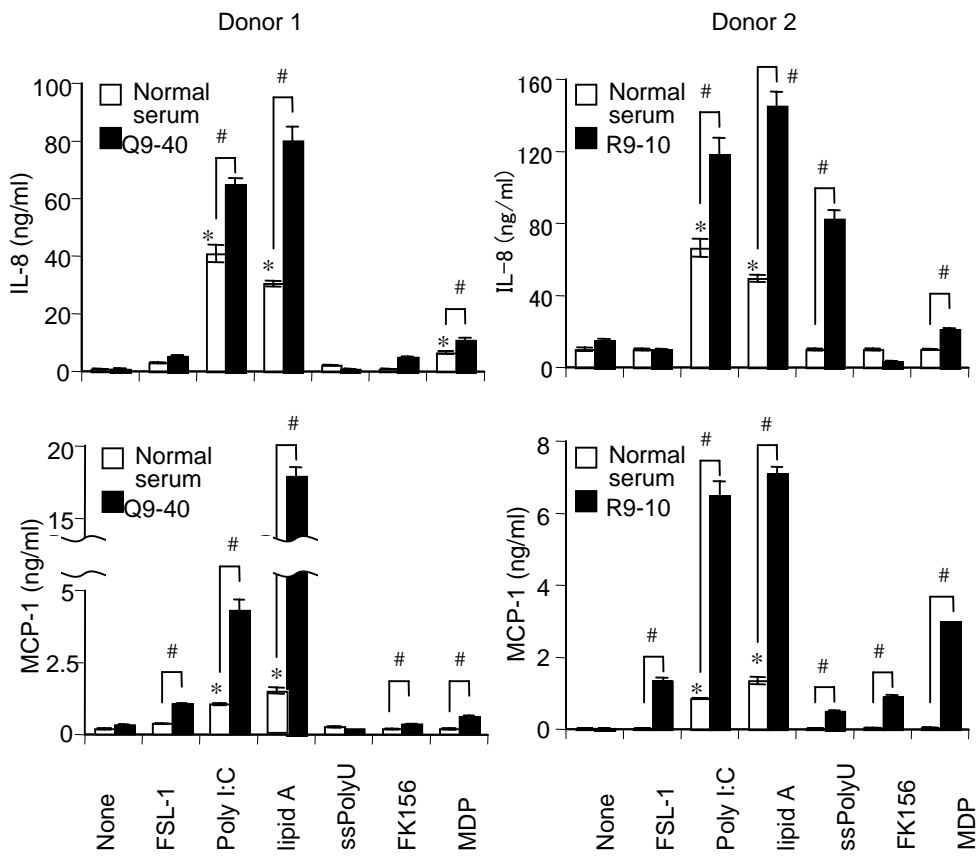

Figure 4

Supplement: MOESM5 [file 9624100]
